# Supplementary material for: Hydrotreatment of renewable oils using hierarchical mesoporous H-ZSM-5 synthesized from kaolin clay
Source: Royal Society of Chemistry journal article supplement (doi:10.1039/c5ra03118d), 2015-01-01

**Supporting Figures:**

**Figure S1:** XRD patterns of parent kaolin clay and calcined kaolin clay (metakaolin)

**Figure S2:** FT-IR spectra of metakaolin (i) MKR-600 (ii) MKR-700

**Figure S1.** XRD patterns of parent kaolin clay and calcined kaolin clay (metakaolin)

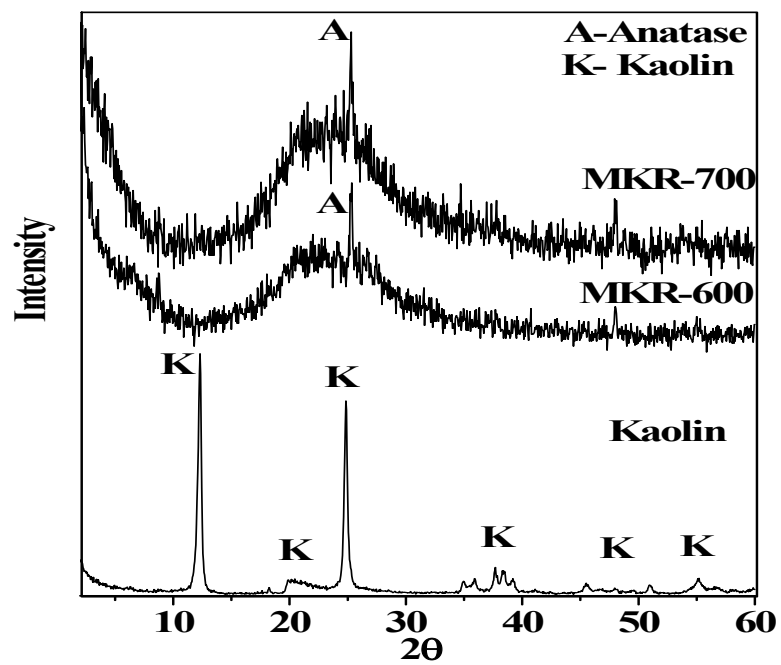

**Figure S2.** FT-IR spectra of metakaolin (i) MKR-600 (ii) MKR-700

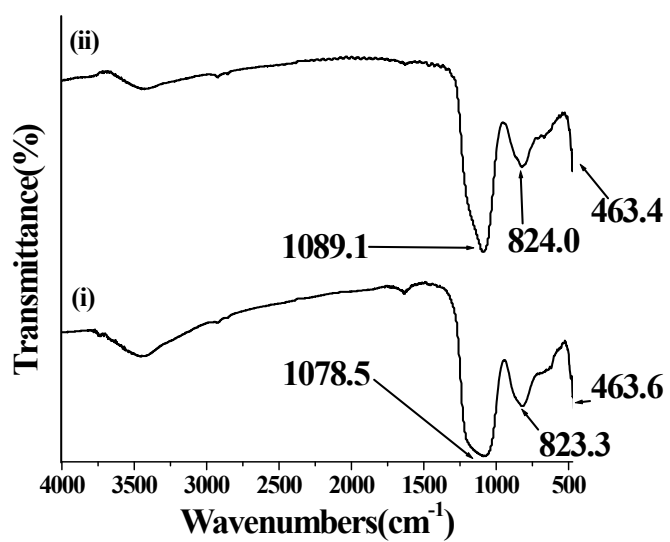

Supplement: c5ra03118d1.pdf [file c5ra03118d1.pdf]
